# Supplementary material for: Green-fluorescent nitrogen-doped carbon nanodots for biological imaging and paper-based sensing
Source: Royal Society of Chemistry journal article supplement (doi:10.1039/c7ay00163k), 2017-01-01
Supplement: c7ay00163k1.pdf [file c7ay00163k1.pdf]

## Electronic Supplementary Information for:

### Green-fluorescent nitrogen-doped carbon nanodots for biological imaging and paper-based sensing

Lihong Shi<sup>a,\*</sup>, Bo Zhao<sup>a</sup>, Xiaofeng Li<sup>b</sup>, Guomei Zhang<sup>a</sup>, Yan Zhang<sup>a</sup>, Chuan Dong<sup>a</sup>, Shaomin Shuang<sup>a,\*</sup>

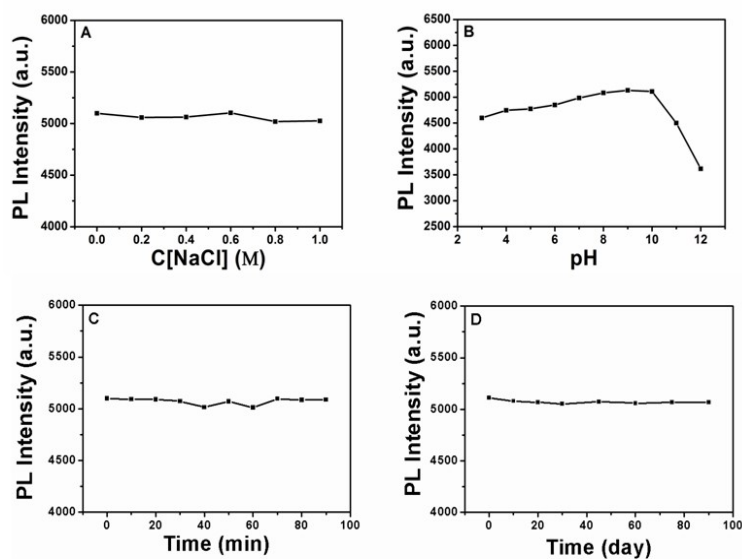

**Fig. S1** (A) Effect of ionic strengths on the fluorescence intensity of N-CDs in various concentration of NaCl (0, 0.2, 0.4, 0.6, 0.8 and 1.0 M). (B) Effect of pH on the PL intensity of N-CDs. (C) Dependence of PL intensity of N-CDs on excitation time. (D) Effect of storage time on the PL intensity of N-CDs.

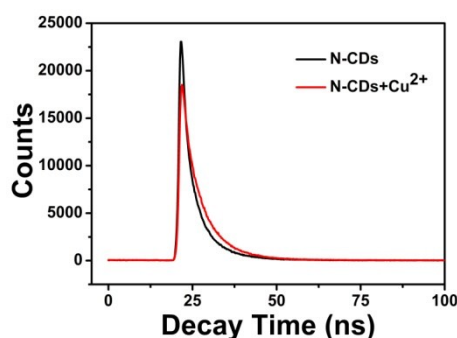

**Fig. S2** Fluorescence decay curves of absence and presence of Cu<sup>2+</sup>.

<sup>a</sup>College of Chemistry and Chemical Engineering, Shanxi University, Taiyuan 030006, PR China

<sup>b</sup>Taiyuan University, Taiyuan 030012, PR China

\* Corresponding author. Tel: +86 531 7011688; fax: +86 531 7018842.

E-mail address: [shilihong@sxu.edu.cn](mailto:shilihong@sxu.edu.cn), [smshuang@sxu.edu.cn](mailto:smshuang@sxu.edu.cn)

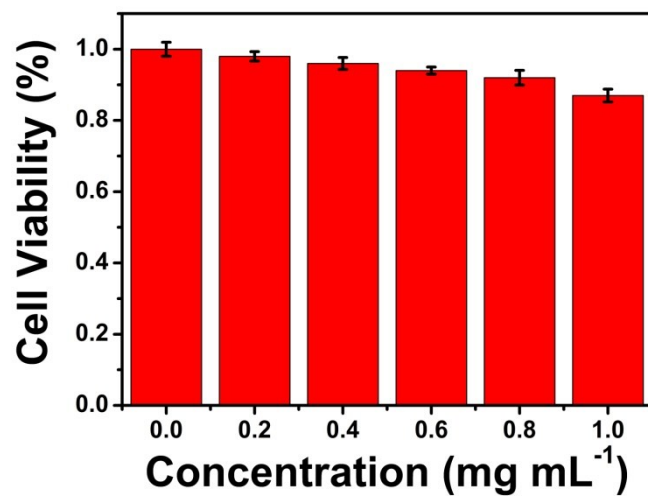

Fig. S3 Cytotoxic effects of N-CDs on HepG2 cells.
